# Supplementary material for: Association between indoor microbiota, home environment characteristics, and frailty status of elderly residents
Source: Research Square preprint supplement (doi:10.21203/rs.3.rs-2063831/v1), 2022-09-16
Supplement: Supplementary file 1 [file 296cac9a3ac131cb3da4f8a8.xlsx]

## Sheet: Table S1
Table S1 Demographic profile of the subjects involved in the study. (n =218), [n%]
Demographical features	Total	Frailty	health	χ2	p
Gender*				9.844	0.002
Male	83(38.2)	32(38.6)	51(61.4)
Female	134(61.8)	81(60.4)	53(39.6)
Age groups*				38.209	<0.001
60~	61(28.0)	21(34.4)	40(65.6)
70~	93(42.7)	39(41.9)	54(58.1)
80~	64(29.4)	54(84.4)	10(15.6)
Educational level				27.154	<0.001
illiterate	51(23.4)	42(82.4)	9(17.6)
Primary	118(54.1)	56(47.5)	62(52.5)
Secondary and above	49(22.5)	16(32.7)	33(67.3)
Marital status*				24.551	<0.001
Married	114(66.1)	58(40.3)	86(59.7)
Widowed	74(33.9)	56(75.7)	18(24.3)
Family relationships*				3.381	0.066
harmonious	205(95.3)	103(50.2)	102(49.8)
Disharmonious	10(4.7)	8(80.0)	2(20.0)
smoking				0.073	0.787
No	188(86.2)	99(52.7)	89(47.3)
Yes	30(13.8)	15(50.0)	15(50.0)
Drinking				2.594	0.107
No	185(84.9)	84(45.4)	101(54.6)
Yes	33(15.1)	20(60.6)	13(39.4)
Monthly income(yuan)*				20.018	<0.001
2000~	40(18.5)	9(22.5)	31(77.5)
1000~	73(33.8)	37(50.7)	36(49.3)
500~	69(31.9)	44(63.8)	25(36.2)
<500	34(5.7）	22(64.7)	12(35.3)

## Sheet: Table S2
Table S2 Bivariate correlation analysis between home environmental factors,α diversity index and frailty status of elderly occupants.
	spouses	area	coefficient of room depth	Window-to-land area ratio	T	RH	WBGT	Noise	Wind speed	PM1.0	PM2.5	PM10	Artificial illumination	daylight factor	chao1（16S）	reads（16S）	richness（16S）	simpson（16S）	chao1（ITS）	reads（ITS）	richness（ITS）	simpson（ITS）
spouses
area	-.190*
coefficient of room depth	0.04	.305**
Window-to-land area ratio	-0.099	0.105	-0.086
T	0.093	-.195*	.217**	-0.083
RH	0.038	0.004	-0.011	0.058	0.145
WBGT	.165*	-.198*	0.14	-0.052	.790**	.316**
Noise	0.06	-.171*	-0.022	-0.024	0.142	.269**	.223**
Wind speed	-0.059	-0.085	-0.074	0.012	-.180*	-0.004	-.173*	-0.117
PM1.0	-0.009	-0.07	-0.142	-0.073	-.177*	.237**	-0.083	-0.026	0.025
PM2.5	0.021	-0.053	-0.049	-.166*	-0.062	.163*	0.024	-0.027	0.039	.773**
PM10	-0.014	-0.147	-0.021	-.235**	.184*	0.145	.216**	0.067	-0.071	.324**	.567**
Artificial illumination	-.168*	0.117	.173*	0.068	0.025	0.045	0.035	0.13	0.085	-0.028	-0.018	-0.024
daylight factor	0.081	-0.086	-0.066	-0.077	-.209**	0.089	-.172*	-0.048	0.02	-0.088	-0.059	0.003	-0.047
chao1（16S）	.190*	-0.155	-0.003	-0.088	.163*	0.152	.172*	0.113	-0.031	-0.013	0.031	.230**	-0.032	-0.014
reads（16S）	.295**	-0.148	0.077	0.016	0.027	-0.059	0.038	-0.071	0.096	-0.105	-0.073	-0.121	-0.049	0.084	-.241**
richness（16S）	.192*	-0.157	-0.003	-0.089	.163*	0.151	.172*	0.114	-0.031	-0.013	0.031	.229**	-0.033	-0.014	1.000**	-.236**
simpson（16S）	-.204*	.235**	0.062	.226**	-0.116	-0.078	-0.122	-0.113	-0.056	-0.09	-.174*	-.267**	-0.01	0.047	-.472**	0.154	-.474**
chao1（ITS）	0.076	-0.044	0.001	0.014	0.092	.229*	0.123	0.072	-0.035	0.005	0.02	0.036	0.019	-0.085	.787**	-.316**	.786**	-.345**
reads（ITS）	-0.066	0.16	-0.108	0.008	-0.029	-0.091	-0.041	0.028	-0.084	0.037	-0.029	0.053	0.055	0.039	0.075	-.368**	0.073	-0.033	0.086
richness（ITS）	0.077	-0.045	0	0.013	0.092	.230*	0.123	0.073	-0.035	0.005	0.02	0.036	0.02	-0.086	.787**	-.315**	.786**	-.346**	1.000**	0.086
simpson（ITS）	-.277**	.273**	-0.098	0.146	-.222*	-0.163	-.203*	-0.096	-0.098	0.02	-0.098	-0.042	0.121	0.141	-.272**	-.318**	-.273**	0.159	-.325**	.649**	-.326**
* p＜0.05, ** p＜0.01

## Sheet: Table S3
Table S3 Bivariate correlation analysis between home environmental factors,bacterial genera and fungal genera.
	spouses	Unassigned	unidentified	Aspergillus	Candida	Trichosporon	Lichtheimia	Curvularia	Coprinopsis	Rhizopus	Cutaneotrichosporon	Lodderomyces	Choanephora	Myceliophthora	Cystobasidium	Sterigmatomyces	Arthrographis	Trichoderma	Penicillium	Starmerella	Hanseniaspora	Hortaea	Schizophyllum	Exserohilum	Tetrahymena	Thermomyces	Eupenidiella	Acremonium	Thermoascus	Acaulium	Oidiodendron	Bacillus	Staphylococcus	Paenibacillus	Kocuria	Unassigned1_B	Exiguobacterium	Lysinibacillus	Pseudomonas	Micrococcus	Acinetobacter	Cellulosimicrobium	Chryseomicrobium	Glutamicibacter	Streptomyces	Corynebacterium	Enhydrobacter	Paenarthrobacter	Brevibacterium
spouses
Unassigned	.195*
unidentified	-.242**	-0.126
Aspergillus	-0.053	.197*	-0.092
Candida	-0.04	-0.103	.246**	-.318**
Trichosporon	0.014	-0.031	0.03	0.101	.391**
Lichtheimia	0.122	-0.108	-0.046	0.004	0.043	.370**
Curvularia	0.15	.249**	-.319**	.269**	.268**	.719**	.269**
Coprinopsis	-.292**	-.381**	.580**	-.173*	0.113	-.177*	-0.105	-.521**
Rhizopus	0.079	0.041	-.228**	0.136	0.028	.412**	0.012	.528**	-.364**
Cutaneotrichosporon	0.13	0.018	.206*	-0.005	0.11	.511**	.188*	.290**	-0.024	.228**
Lodderomyces	.184*	.206*	-.216**	0.155	.180*	.570**	.624**	.639**	-.468**	.203*	.435**
Choanephora	-.236**	-.368**	.529**	-0.12	0.105	-0.128	-0.065	-.485**	.853**	-.323**	-0.033	-.448**
Myceliophthora	-.253**	-.321**	.520**	-0.121	0.081	-.214**	-0.119	-.456**	.845**	-.311**	-0.033	-.436**	.896**
Cystobasidium	-0.025	.215**	0.081	0.097	0.149	.330**	.464**	.300**	-.285**	-.170*	-0.08	.534**	-.268**	-.269**
Sterigmatomyces	-0.109	-0.046	.445**	-0.003	0.125	-0.027	0.043	-.275**	.659**	-.302**	-0.009	-.269**	.589**	.579**	-0.081
Arthrographis	0.157	0.078	-.298**	0.095	0.004	.378**	.296**	.461**	-.319**	.429**	.614**	.576**	-.303**	-.299**	-0.137	-.241**
Trichoderma	.296**	.273**	-0.146	.204*	0.011	.374**	.308**	.462**	-.251**	.233**	.680**	.629**	-.245**	-.229**	0.058	-0.069	.724**
Penicillium	.221**	.497**	-0.116	.418**	-.260**	-0.08	-0.05	.168*	-.395**	-0.109	0.081	.218**	-.375**	-.369**	.289**	-0.124	0.017	.252**
Starmerella	-0.054	-0.061	.191*	0.052	0.012	-0.105	0.098	-.209**	.377**	-.213**	-0.077	-.218**	.429**	.401**	-0.122	.317**	-0.147	-0.1	-.166*
Hanseniaspora	-.167*	-.168*	.336**	-0.05	.161*	-.160*	-0.037	-.322**	.647**	-.294**	-0.091	-.333**	.658**	.652**	-.193*	.531**	-.240**	-.160*	-.247**	.807**
Hortaea	0.095	.182*	0.01	0.151	-.199*	-0.118	0.003	-0.103	.316**	-.205*	0.136	-0.129	.311**	.307**	-0.124	.439**	0.058	.176*	0.156	.217**	.326**
Schizophyllum	0.091	.272**	-0.072	0.01	0.042	-.177*	-0.144	-0.042	-0.083	-.238**	-0.118	-0.041	-0.093	-0.101	0.092	0.129	-.185*	-0.026	.333**	-0.029	-0.029	.198*
Exserohilum	0.003	0.112	-.250**	0.116	.279**	.356**	-.208*	.556**	-.264**	.451**	-.173*	-0.016	-.247**	-.247**	-0.041	-.199*	-0.072	-.187*	-0.065	-0.113	-.180*	-.181*	0.063
Tetrahymena	-.172*	-.324**	.578**	-.240**	0.105	-0.036	-0.049	-.367**	.606**	-.235**	.178*	-.332**	.530**	.559**	-.194*	.356**	-.206*	-.211**	-.351**	.204*	.317**	0.114	-0.133	-.185*
Thermomyces	-0.098	.300**	.222**	0.088	-0.122	-0.142	-0.064	-0.041	-.195*	0.047	-0.114	0.067	-.171*	-.170*	.235**	-0.064	-0.057	-0.065	.296**	-0.124	-0.134	-0.114	0.052	-0.008	-0.138
Eupenidiella	0.131	.316**	.213**	.207*	-.174*	-.252**	-0.136	-0.134	.199*	-.172*	-0.106	-.248**	.202*	.195*	-0.053	.486**	-.215**	0.001	.304**	.164*	.235**	.539**	.168*	-0.129	-0.027	.290**
Acremonium	0.125	.349**	-0.037	.222**	-.334**	-.208**	-.334**	-0.031	-.292**	-0.031	0.027	-0.148	-.282**	-.280**	0.039	-.182*	-0.134	-0.02	.751**	-0.126	-.213**	0.111	.236**	0.064	-.237**	.342**	.325**
Thermoascus	0.03	.183*	0.091	0.055	-0.152	-.260**	0.083	-0.114	-.243**	0.064	-.270**	0.09	-.224**	-.234**	.211**	-.163*	-0.076	-0.108	0.144	-0.123	-.197*	-.200*	0.021	-0.028	-0.14	.600**	0.128	0.082
Acaulium	0.019	.287**	0.138	0.158	-0.019	0.072	-.280**	.189*	-.294**	0.035	.177*	-0.022	-.278**	-.275**	0.124	-.239**	-0.074	0.074	.545**	-0.135	-.221**	-0.074	.164*	0.138	-.189*	.190*	0.096	.675**	-0.157
Oidiodendron	0.068	.355**	0.145	.162*	0.03	0.131	-.188*	.267**	-.373**	0.04	0.099	0.1	-.355**	-.351**	.320**	-.261**	-0.114	0.026	.543**	-.172*	-.277**	-0.109	.212**	.222**	-.242**	.322**	0.124	.592**	0.003	.820**
Bacillus	0.002	-0.073	0.006	-0.128	0.073	0.118	-0.091	0.11	-.175*	.197*	0.145	0.043	-0.151	-0.156	-0.048	-.244**	0.062	0.02	-.165*	-0.104	-0.1	-.320**	-0.142	0.119	0.011	0.05	-.235**	-0.035	-0.011	0.063	0.072
Staphylococcus	0.1	0.005	-0.141	0.12	-0.066	-0.078	-0.135	0.059	-0.099	0.07	-0.104	-0.11	-0.085	-0.027	-0.09	-0.125	0.02	-0.019	0.03	-0.011	-0.056	0.035	0.112	0.158	-0.131	-0.06	-0.011	0.069	-0.028	0.115	0.101	-.211**
Paenibacillus	-0.072	-0.088	0.012	-.186*	.226**	0.038	-0.147	-0.082	0.021	0.073	0.114	-0.089	0.099	0.006	-.207*	-0.069	0.034	-0.037	-.166*	0.01	0.004	-0.015	-0.036	0.038	0.043	-0.107	-0.086	-0.051	-0.064	0.044	0.058	0.134	-0.083
Kocuria	-0.001	0.001	-0.062	0.133	-0.001	-0.034	0.124	0.005	0.079	0.005	-0.109	0.006	0.099	0.052	0.023	0.13	0.018	0.053	0.049	-0.045	0.09	0.112	0.123	-0.01	-0.03	-0.076	0.099	-0.08	0.058	-.234**	-.211**	-.368**	0.007	-.259**
Unassigned1_B	.246**	.198*	-0.11	0.034	0.077	0.026	0.028	0.087	-0.096	0.001	0.009	0.004	-0.067	-0.07	-0.014	0.088	0.016	0.104	0.118	-0.081	-0.067	0.101	0.117	0.052	-0.139	-0.116	.242**	0.06	0.047	0.044	0.022	-0.088	.253**	0.032	.223**
Exiguobacterium	-0.081	-0.103	.211**	-0.035	0.128	0.055	-0.08	-0.011	.258**	0.027	0.118	-0.155	.220**	.170*	-0.083	0.102	-0.063	0.014	-0.101	0.07	0.107	0.039	-0.043	0.063	.168*	-0.116	0.049	0.013	-0.126	0.099	0.096	.172*	-0.041	0.126	-0.026	.189*
Lysinibacillus	0.1	0.006	-.213**	-0.057	0.065	0.104	.161*	0.152	-.171*	0.075	.174*	.280**	-.193*	-.204*	0.002	-0.131	.373**	.256**	-0.049	-.167*	-.214**	-0.042	0.117	-0.02	-0.109	-0.062	-0.15	-0.136	-0.007	-0.133	-0.087	.258**	-0.106	0.07	0.002	0.14	0.04
Pseudomonas	.176*	.177*	-.200*	-0.013	-0.096	-0.008	.274**	0.012	-0.085	-0.088	-0.021	.211**	-0.091	-0.152	0.138	0.012	.162*	0.135	0.149	-0.035	-0.105	.212**	0.076	-0.143	-.211**	-0.014	0.086	-0.023	0.086	-0.123	-0.093	-.167*	-0.122	-0.067	0.137	.312**	-0.043	.207*
Micrococcus	0.027	.204*	-0.055	0.136	-0.01	-0.022	0.054	0.094	-0.07	0.034	-0.072	0.048	-0.054	-0.05	0.069	0.116	0.001	0.083	0.149	-0.071	-0.034	0.083	.167*	-0.005	-0.144	0.08	.195*	0.025	0.086	0.064	0.035	-.175*	0.064	-0.119	.416**	.163*	-0.118	-0.006	0.13
Acinetobacter	0.108	0.1	-0.075	0.037	-0.071	0.036	-0.043	0.055	0.155	0.004	-0.034	-0.072	0.075	0.056	-0.046	.225**	-0.032	0.082	0.043	0.057	0.113	.262**	0.101	0.011	-0.106	-0.109	.281**	-0.002	-0.113	-0.006	-0.028	-0.113	-0.034	-0.016	0.135	.301**	.280**	-0.013	.321**	0.151
Cellulosimicrobium	.307**	.179*	-.311**	0.088	-0.046	-0.036	-0.05	.169*	-.198*	0.079	-0.044	0.018	-.163*	-0.114	-0.093	-0.098	0.049	0.116	0.151	-0.125	-0.124	0.086	.234**	0.158	-.176*	-0.101	0.078	0.073	-0.07	0.07	0.066	-0.113	0.088	0.006	.257**	.342**	-0.047	0.08	0.141	.302**	.175*
Chryseomicrobium	.164*	0.137	-0.124	-0.07	0.122	.160*	-0.032	.179*	-0.019	0.122	0.123	0.093	-0.028	-0.079	-0.022	0.002	0.117	0.144	-0.029	-0.038	-0.041	0.004	0.038	.190*	-0.146	-0.065	0.052	-0.05	-0.109	0.049	0.089	0.026	0.091	0.028	0.114	0.152	.162*	0.111	0.043	0.064	.198*	.196*
Glutamicibacter	0.071	0.049	-0.014	-0.031	0.096	-0.026	0.054	0.046	-0.007	-0.06	-0.052	0.058	-0.004	0.004	0.011	-0.019	0.009	0.09	-0.033	-0.059	-0.067	-0.055	.258**	-0.022	-0.09	-0.016	0.067	-0.089	0.111	-0.06	-0.033	-0.065	0.043	0.001	.283**	.249**	0.133	.164*	0.081	.361**	.221**	.346**	.188*
Streptomyces	0.116	.280**	-.182*	.198*	-0.042	0.028	-0.026	.241**	-.225**	0.078	-0.064	0.046	-.251**	-.223**	0.1	-0.033	0.003	0.12	.208**	0.053	-0.04	0.075	.181*	.171*	-.329**	-0.016	.177*	0.137	-0.036	.193*	.217**	-.221**	.160*	-0.058	.201*	.194*	-0.047	-0.034	0.038	.260**	.190*	.439**	.218**	.261**
Corynebacterium	0.083	.210**	0.007	0.117	0	-0.03	-0.145	0.049	0.097	-0.054	-0.058	-0.148	0.122	0.09	-0.084	.218**	-0.112	-0.002	0.113	0.04	0.112	.218**	.172*	0.095	-0.026	-0.027	.339**	0.061	-0.12	0.118	0.024	-.281**	0.024	-0.088	.434**	.258**	0.004	-.165*	0.059	.409**	.203*	.385**	.362**	0.149	.300**
Enhydrobacter	-0.046	0.102	-0.002	0.156	0.04	-0.017	0.018	0.059	0.04	0.007	-0.074	0.017	0.045	0.018	0.058	0.091	0.009	0.063	0.11	0.069	0.069	0.091	0.044	0.074	-0.105	0.078	.267**	0.022	0.122	-0.03	-0.022	-0.003	-0.045	-0.153	0.136	.165*	0.135	0.023	.282**	0.145	.370**	-0.019	0.054	0.155	-0.096	0.065
Paenarthrobacter	.290**	.282**	-.286**	0.104	0.025	0.037	-.169*	.248**	-.324**	.178*	-0.059	0.011	-.315**	-.307**	-0.055	-.167*	0.049	0.129	.220**	-0.129	-.198*	-0.029	0.106	.245**	-.257**	-0.024	0.136	.200*	-0.081	.222**	.236**	-.206*	0.096	0.087	0.115	.239**	-0.063	-0.105	0.006	0.157	0.15	.424**	.335**	0.155	.417**	.317**	0.001
Brevibacterium	.199*	0.125	-.167*	0.084	-0.061	0.012	.190*	0.15	-0.024	0.049	-0.061	0.059	-0.051	-0.038	0.018	.168*	0.036	0.105	0.056	-0.014	-0.017	.172*	0.118	0.036	-.180*	-0.073	.290**	-0.048	0.022	-0.081	-0.083	-.236**	-0.002	-.162*	.311**	.340**	-0.08	0.013	.298**	.468**	.253**	.327**	0.087	.286**	.361**	.309**	.172*	.250**
Macrococcus	0.047	0.048	-0.098	0.047	0.019	-0.025	0.051	0.076	-.184*	-0.001	-0.156	0.103	-.161*	-.161*	0.133	-0.147	-0.059	-0.122	0.087	-0.091	-0.149	-0.084	0.135	.204*	-0.083	-0.016	-0.101	0.011	.177*	0.002	0.153	-0.025	0.055	0.044	-0.003	0.078	0.028	-0.1	0.01	-0.045	-0.147	0.079	-0.026	-0.004	0.068	0.08	0.029	0.063	-0.014
Sporosarcina	0.134	0.116	-0.147	0.07	0.078	0.062	-.172*	.202*	-.192*	0.072	-0.089	-0.097	-.161*	-.192*	-0.014	-0.123	-0.139	-0.05	0.113	-0.105	-0.106	-0.069	0.068	.302**	-.191*	-0.055	0.102	0.142	-0.105	.250**	.255**	0.112	0.089	0.105	0.023	.239**	0.147	0.036	-0.141	0.003	0.15	.254**	.276**	0.15	.367**	.261**	0.041	.448**	0.137
Aerococcus	.177*	0.118	0.015	0.025	0.015	0.144	0.116	0.146	-0.086	0.089	.183*	.209**	-0.027	-0.039	0.086	0.024	0.115	.194*	0.035	-0.091	-0.082	0.01	0.027	-0.008	-0.121	0.062	0.047	0.01	0.007	0.023	0.056	0.061	0.028	0.014	0.139	.165*	-0.013	0.12	0.097	.243**	0.066	0.11	.232**	.200*	-0.003	.166*	0.022	0.016	0.085
Brachybacterium	0.139	.177*	-0.103	0.059	-0.012	0.029	.163*	.177*	-0.058	0.049	-0.03	0.081	0.011	0.032	0.006	0.095	0.05	0.134	0.03	-0.076	-0.018	0.134	0.117	0.046	-0.132	-0.051	.220**	-0.07	0.028	-0.063	-0.058	-.212**	0.014	-0.15	.501**	.438**	-0.013	0.01	.177*	.512**	.229**	.355**	0.151	.400**	.311**	.411**	0.106	.193*	.407**
Brevibacillus	-.266**	-.333**	.402**	-0.157	0.067	-0.008	-0.031	-.310**	.588**	-.212**	0.146	-.214**	.550**	.536**	-.180*	.378**	-0.093	-0.097	-.331**	.245**	.442**	0.131	-0.129	-.237**	.462**	-.173*	0.007	-.271**	-0.14	-.246**	-.301**	0.01	-0.094	.223**	-0.01	-0.023	.228**	-0.076	-0.09	-0.106	0.144	-.220**	-0.113	-0.032	-.296**	-0.05	0.033	-.374**	-0.13
* p＜0.05, ** p＜0.01
[truncated: 5 more columns]

## Sheet: Table S4
Table S4 Indoor environmental factors compared with the level of frailty of couples [M(p25，p75)].
project	Group A（n=42）	Group B（n=66）	Group C(n=45）	χ2	P
area	64.26(44.76,93.23)	61.35(32.13,114.79)	35.60(18.56,74.34)	10.83	0.004
coefficient of room depth	2.42(1.84,3.31)	2.56(1.82,3.56)	2.74(1.94,3.63)	0.26	0.876
Window-to-land area ratio	0.12(0.07,0.21)	0.12(0.04,0.17)	0.10(0.00,0.17)	2.71	0.258
T	22.15(18.75,24.42)	22.00(18.88,22.92)	24.30(20.40,26.30)	2.34	0.31
RH	53.80(48.05,62.62)	53.90(45.78,61.48)	54.13(50.10,64.15)	0.78	0.676
WBGT	17.90(15.38,20.30)	17.85(14.78,21.25)	19.90(17.75,21.70)	4.97	0.083
Noise	59.90(55.94,63.49)	58.02(55.24,62.58)	60.17(56.01,66.08)	3.16	0.206
Wind speed	0.10(0.03,0.24)	0.07(0.03,0.20)	0.14(0.07,0.24)	3.52	0.172
PM1.0	8.89(5.62,12.21)	8.92(5.68,11.96)	9.01(6.42,11.68)	0.05	0.973
PM2.5	24.49(16.56,37.26)	25.64(18.33,35.01)	23.55(19.91,34.00)	0.07	0.964
PM10	96.02(74.24,131.14)	102.58(75.66,142.33)	122.42(97.56,150.31)	3.36	0.186
daylight factor	0.02(0.01,0.08)	0.02(0.01,0.06)	0.01(0.01,0.07)	0.35	0.838
Artificial illumination	66.4(49.35,95.60)	37.83(22.38,62.05)	28.50(17.49,39.80)	46.35	<0.001
24h average colony number	16.00(12.64,37.25)	17.50(8.44,48.56)	29.50(15.62,63.50)	6.78	0.034

## Sheet: Table S5
Table S5 Bivariate correlation analysis between bacterial genera , fungal genera and frailty status of elderly occupants.
	area	Artificial illumination	Bacillus	Staphylococcus	Paenibacillus	Kocuria	(Unassigned)	Exiguobacterium	Lysinibacillus	Pseudomonas	Micrococcus	Acinetobacter	Cellulosimicrobium	Chryseomicrobium	Glutamicibacter	Streptomyces	Corynebacterium_1	Enhydrobacter	Paenarthrobacter	Brevibacterium	Macrococcus	Sporosarcina	Aerococcus	Brachybacterium	Brevibacillus	(Unassigned)	unidentified	Aspergillus	Candida	Trichosporon	Lichtheimia	Curvularia	Coprinopsis	Rhizopus	Cutaneotrichosporon	Lodderomyces	Choanephora	Myceliophthora	Cystobasidium	Sterigmatomyces	Arthrographis	Trichoderma	Penicillium	Starmerella	Hanseniaspora	Hortaea	Schizophyllum	Exserohilum	Tetrahymena
area	1
Artificial illumination	0.117	1
Bacillus	0.108	-0.144	1
Staphylococcus	-0.015	0.041	-.211**	1
Paenibacillus	-0.025	0.001	0.134	-0.083	1
Kocuria	-.177*	-0.04	-.368**	0.007	-.259**	1
(Unassigned)	-0.131	-0.049	-0.088	.253**	0.032	.223**	1
Exiguobacterium	-0.006	0.021	.172*	-0.041	0.126	-0.026	.189*	1
Lysinibacillus	-0.025	-.162*	.258**	-0.106	0.07	0.002	0.14	0.04	1
Pseudomonas	-.180*	-0.076	-.167*	-0.122	-0.067	0.137	.312**	-0.043	.207*	1
Micrococcus	-0.131	-0.092	-.175*	0.064	-0.119	.416**	.163*	-0.118	-0.006	0.13	1
Acinetobacter	-0.029	0.037	-0.113	-0.034	-0.016	0.135	.301**	.280**	-0.013	.321**	0.151	1
Cellulosimicrobium	-.196*	-0.082	-0.113	0.088	0.006	.257**	.342**	-0.047	0.08	0.141	.302**	.175*	1
Chryseomicrobium	-.201*	-0.004	0.026	0.091	0.028	0.114	0.152	.162*	0.111	0.043	0.064	.198*	.196*	1
Glutamicibacter	-0.09	0.01	-0.065	0.043	0.001	.283**	.249**	0.133	.164*	0.081	.361**	.221**	.346**	.188*	1
Streptomyces	-.205*	-0.044	-.221**	.160*	-0.058	.201*	.194*	-0.047	-0.034	0.038	.260**	.190*	.439**	.218**	.261**	1
Corynebacterium_1	-.176*	-0.042	-.281**	0.024	-0.088	.434**	.258**	0.004	-.165*	0.059	.409**	.203*	.385**	.362**	0.149	.300**	1
Enhydrobacter	0.013	0.143	-0.003	-0.045	-0.153	0.136	.165*	0.135	0.023	.282**	0.145	.370**	-0.019	0.054	0.155	-0.096	0.065	1
Paenarthrobacter	-0.157	0.106	-.206*	0.096	0.087	0.115	.239**	-0.063	-0.105	0.006	0.157	0.15	.424**	.335**	0.155	.417**	.317**	0.001	1
Brevibacterium	-.163*	-0.057	-.236**	-0.002	-.162*	.311**	.340**	-0.08	0.013	.298**	.468**	.253**	.327**	0.087	.286**	.361**	.309**	.172*	.250**	1
Macrococcus	-0.113	-0.038	-0.025	0.055	0.044	-0.003	0.078	0.028	-0.1	0.01	-0.045	-0.147	0.079	-0.026	-0.004	0.068	0.08	0.029	0.063	-0.014
Sporosarcina	-0.027	-0.077	0.112	0.089	0.105	0.023	.239**	0.147	0.036	-0.141	0.003	0.15	.254**	.276**	0.15	.367**	.261**	0.041	.448**	0.137	0.108	1
Aerococcus	-0.151	-0.013	0.061	0.028	0.014	0.139	.165*	-0.013	0.12	0.097	.243**	0.066	0.11	.232**	.200*	-0.003	.166*	0.022	0.016	0.085	0.044	0.047	1
Brachybacterium	-.247**	0.028	-.212**	0.014	-0.15	.501**	.438**	-0.013	0.01	.177*	.512**	.229**	.355**	0.151	.400**	.311**	.411**	0.106	.193*	.407**	0.034	0.078	.229**	1
Brevibacillus	.167*	0.116	0.01	-0.094	.223**	-0.01	-0.023	.228**	-0.076	-0.09	-0.106	0.144	-.220**	-0.113	-0.032	-.296**	-0.05	0.033	-.374**	-0.13	-0.158	-.284**	0.034	-0.136	1
(Unassigned)	-.293**	0.011	-0.083	0.006	-0.096	0.001	.226*	-0.122	0.007	.207*	.231*	0.125	.210*	0.171	0.054	.339**	.246**	0.117	.369**	0.146	0.051	0.136	0.14	.194*	-.354**	1
unidentified	0.1	.218*	0.007	-0.165	0.012	-0.073	-0.125	.247**	-.251**	-.234*	-0.063	-0.094	-.364**	-0.155	-0.015	-.220*	0.008	-0.002	-.373**	-.196*	-0.104	-0.173	0.018	-0.113	.427**	-0.126	1
Aspergillus	0.072	-0.027	-0.145	0.14	-.202*	0.155	0.039	-0.042	-0.067	-0.015	0.153	0.046	0.103	-0.087	-0.035	.240**	0.137	0.179	0.135	0.098	0.05	0.082	0.03	0.065	-0.167	.197*	-0.092	1
Candida	-0.051	0.03	0.083	-0.077	.245**	-0.001	0.087	0.151	0.076	-0.112	-0.011	-0.088	-0.054	0.153	0.107	-0.051	0	0.046	0.033	-0.072	0.021	0.091	0.018	-0.013	0.071	-0.103	.246**	-.318**	1
Trichosporon	0.024	0.031	0.133	-0.091	0.041	-0.04	0.03	0.065	0.123	-0.009	-0.025	0.045	-0.043	.201*	-0.029	0.034	-0.035	-0.02	0.048	0.014	-0.026	0.073	0.171	0.032	-0.009	-0.031	0.03	0.101	.391**	1
Lichtheimia	-0.166	-0.085	-0.103	-0.158	-0.159	0.144	0.032	-0.094	.191*	.321**	0.061	-0.053	-0.059	-0.04	0.06	-0.031	-0.17	0.021	-.220*	.223*	0.054	-.202*	0.138	0.179	-0.033	-0.108	-0.046	0.004	0.043	.370**	1
Curvularia	-0.051	0.027	0.125	0.069	-0.089	0.006	0.099	-0.013	0.179	0.013	0.107	0.068	.198*	.225*	0.052	.292**	0.057	0.068	.324**	0.176	0.08	.237*	0.173	.194*	-.329**	.249**	-.319**	.269**	.268**	.719**	.269**	1
Coprinopsis	0.172	0.176	-.199*	-0.117	0.023	0.093	-0.109	.303**	-.203*	-0.099	-0.079	.193*	-.232*	-0.024	-0.008	-.272**	0.113	0.045	-.423**	-0.028	-.195*	-.226*	-0.102	-0.063	.624**	-.381**	.580**	-0.173	0.113	-0.177	-0.105	-.521**	1
Rhizopus	-0.069	-0.006	.223*	0.083	0.08	0.006	0.001	0.032	0.089	-0.103	0.038	0.006	0.092	0.153	-0.067	0.094	-0.063	0.008	.232*	0.057	-0.001	0.085	0.105	0.054	-.225*	0.041	-.228*	0.136	0.028	.412**	0.012	.528**	-.364**	1
Cutaneotrichosporon	-0.068	0.059	0.165	-0.122	0.123	-0.127	0.01	0.138	.206*	-0.024	-0.081	-0.042	-0.052	0.154	-0.058	-0.077	-0.068	-0.085	-0.077	-0.071	-0.165	-0.104	.216*	-0.033	0.155	0.018	.206*	-0.005	0.11	.511**	.188*	.290**	-0.024	.228*	1
Lodderomyces	-.230*	-0.127	0.048	-0.129	-0.097	0.007	0.004	-.182*	.331**	.247**	0.055	-0.09	0.021	0.116	0.065	0.055	-0.173	0.019	0.015	0.069	0.109	-0.114	.248**	0.089	-.227*	.206*	-.216*	0.155	0.18	.570**	.624**	.639**	-.468**	.203*	.435**	1
Choanephora	0.152	0.132	-0.171	-0.099	0.108	0.116	-0.076	.258**	-.228*	-0.107	-0.061	0.093	-.191*	-0.036	-0.005	-.304**	0.143	0.052	-.411**	-0.06	-0.171	-.189*	-0.032	0.012	.584**	-.368**	.529**	-0.12	0.105	-0.128	-0.065	-.485**	.853**	-.323**	-0.033	-.448**	1
Myceliophthora	0.171	0.11	-0.177	-0.032	0.007	0.061	-0.08	.200*	-.242**	-0.178	-0.056	0.07	-0.134	-0.099	0.004	-.270**	0.106	0.021	-.401**	-0.044	-0.171	-.226*	-0.046	0.035	.569**	-.321**	.520**	-0.121	0.081	-.214*	-0.119	-.456**	.845**	-.311**	-0.033	-.436**	.896**	1
Cystobasidium	-0.102	-0.108	-0.055	-0.105	-.224*	0.027	-0.017	-0.098	0.003	0.162	0.078	-0.057	-0.109	-0.027	0.012	0.121	-0.098	0.066	-0.072	0.021	0.141	-0.017	0.102	0.006	-.190*	.215*	0.081	0.097	0.149	.330**	.464**	.300**	-.285**	-0.17	-0.08	.534**	-.268**	-.269**	1
Sterigmatomyces	0.063	0.136	-.276**	-0.146	-0.075	0.152	0.1	0.12	-0.155	0.014	0.131	.280**	-0.115	0.003	-0.022	-0.04	.255**	0.104	-.218*	.197*	-0.156	-0.144	0.029	0.104	.400**	-0.046	.445**	-0.003	0.125	-0.027	0.043	-.275**	.659**	-.302**	-0.009	-.269**	.589**	.579**	-0.081	1
Arthrographis	-0.139	-0.056	0.07	0.023	0.037	0.021	0.018	-0.074	.441**	.189*	0.001	-0.04	0.057	0.147	0.01	0.003	-0.131	0.01	0.064	0.042	-0.062	-0.164	0.137	0.055	-0.099	0.078	-.298**	0.095	0.004	.378**	.296**	.461**	-.319**	.429**	.614**	.576**	-.303**	-.299**	-0.137	-.241**	1
Trichoderma	-.216*	-0.051	0.022	-0.022	-0.04	0.061	0.118	0.017	.303**	0.158	0.094	0.103	0.136	0.181	0.101	0.146	-0.003	0.072	0.169	0.123	-0.129	-0.059	.230*	0.148	-0.103	.273**	-0.146	.204*	0.011	.374**	.308**	.462**	-.251**	.233*	.680**	.629**	-.245**	-.229*	0.058	-0.069	.724**	1
Penicillium	-0.164	-0.165	-.187*	0.035	-0.18	0.058	0.135	-0.118	-0.058	0.175	0.169	0.053	0.177	-0.037	-0.036	.252**	0.132	0.126	.288**	0.066	0.092	0.133	0.041	0.033	-.351**	.497**	-0.116	.418**	-.260**	-0.08	-0.05	0.168	-.395**	-0.109	0.081	.218*	-.375**	-.369**	.289**	-0.124	0.017	.252**	1
Starmerella	-0.009	0.071	-0.118	-0.013	0.011	-0.053	-0.093	0.083	-.197*	-0.041	-0.08	0.071	-0.147	-0.047	-0.065	0.064	0.047	0.079	-0.168	-0.016	-0.096	-0.123	-0.108	-0.083	.260**	-0.061	.191*	0.052	0.012	-0.105	0.098	-.209*	.377**	-.213*	-0.077	-.218*	.429**	.401**	-0.122	.317**	-0.147	-0.1	-0.166	1
Hanseniaspora	0.035	0.08	-0.113	-0.065	0.004	0.105	-0.077	0.125	-.253**	-0.123	-0.038	0.141	-0.145	-0.052	-0.075	-0.049	0.131	0.079	-.259**	-0.019	-0.158	-0.124	-0.098	-0.019	.469**	-0.168	.336**	-0.05	0.161	-0.16	-0.037	-.322**	.647**	-.294**	-0.091	-.333**	.658**	.652**	-.193*	.531**	-.240**	-0.16	-.247**	.807**	1
Hortaea	-0.055	-0.036	-.363**	0.041	-0.017	0.131	0.115	0.046	-0.05	.248**	0.094	.326**	0.101	0.005	-0.061	0.091	.255**	0.104	-0.038	.201*	-0.089	-0.082	0.012	0.147	0.139	0.182	0.01	0.151	-.199*	-0.118	0.003	-0.103	.316**	-.205*	0.136	-0.129	.311**	.307**	-0.124	.439**	0.058	0.176	0.156	.217*	.326**	1
Schizophyllum	-0.069	-0.022	-0.161	0.131	-0.039	0.144	0.133	-0.051	0.139	0.089	.189*	0.126	.275**	0.047	.288**	.219*	.201*	0.05	0.138	0.139	0.143	0.079	0.032	0.128	-0.137	.272**	-0.072	0.01	0.042	-0.177	-0.144	-0.042	-0.083	-.238**	-0.118	-0.041	-0.093	-0.101	0.092	0.129	-.185*	-0.026	.333**	-0.029	-0.029	.198*	1
Exserohilum	0.035	0.078	0.135	.185*	0.041	-0.011	0.059	0.074	-0.024	-0.167	-0.006	0.013	.185*	.239**	-0.024	.207*	0.111	0.084	.320**	0.042	.216*	.355**	-0.009	0.051	-.252**	0.112	-.250**	0.116	.279**	.356**	-.208*	.556**	-.264**	.451**	-0.173	-0.016	-.247**	-.247**	-0.041	-.199*	-0.072	-.187*	-0.065	-0.113	-0.18	-0.181	0.063	1
Tetrahymena	.259**	.191*	0.012	-0.153	0.047	-0.034	-0.158	.198*	-0.129	-.247**	-0.162	-0.132	-.206*	-.183*	-0.1	-.398**	-0.031	-0.12	-.336**	-.211*	-0.088	-.224*	-0.144	-0.145	.490**	-.324**	.578**	-.240**	0.105	-0.036	-0.049	-.367**	.606**	-.235*	0.178	-.332**	.530**	.559**	-.194*	.356**	-.206*	-.211*	-.351**	.204*	.317**	0.114	-0.133	-.185*	1
Thermomyces	-0.022	-0.067	0.057	-0.07	-0.116	-0.089	-0.132	-0.136	-0.074	-0.016	0.091	-0.135	-0.119	-0.081	-0.018	-0.019	-0.032	0.089	-0.031	-0.086	-0.017	-0.064	0.073	-0.056	-.184*	.300**	.222*	0.088	-0.122	-0.142	-0.064	-0.041	-.195*	0.047	-0.114	0.067	-0.171	-0.17	.235*	-0.064	-0.057	-0.065	.296**	-0.124	-0.134	-0.114	0.052	-0.008	-0.138
Eupenidiella	-0.027	-0.012	-.267**	-0.013	-0.093	0.115	.276**	0.057	-0.177	0.1	.221*	.350**	0.091	0.066	0.074	.214*	.396**	.306**	0.178	.340**	-0.107	0.119	0.056	.242**	0.007	.316**	.213*	.207*	-0.174	-.252**	-0.136	-0.134	.199*	-0.172	-0.106	-.248**	.202*	.195*	-0.053	.486**	-.215*	0.001	.304**	0.164	.235*	.539**	0.168	-0.129	-0.027
Acremonium	-0.1	-0.103	-0.04	0.081	-0.056	-0.093	0.069	0.015	-0.161	-0.027	0.028	-0.002	0.086	-0.063	-0.099	0.166	0.072	0.025	.262**	-0.056	0.011	0.167	0.011	-0.077	-.287**	.349**	-0.037	.222*	-.334**	-.208*	-.334**	-0.031	-.292**	-0.031	0.027	-0.148	-.282**	-.280**	0.039	-0.182	-0.134	-0.02	.751**	-0.126	-.213*	0.111	.236*	0.064	-.237*
Thermoascus	-0.036	-0.074	-0.012	-0.033	-0.069	0.068	0.053	-0.148	-0.008	0.101	0.097	-0.14	-0.082	-0.137	0.123	-0.044	-0.14	0.139	-0.106	0.026	.188*	-0.124	0.009	0.031	-0.148	.183*	0.091	0.055	-0.152	-.260**	0.083	-0.114	-.243**	0.064	-.270**	0.09	-.224*	-.234*	.211*	-0.163	-0.076	-0.108	0.144	-0.123	-.197*	-.200*	0.021	-0.028	-0.14
Acaulium	-0.07	0.006	0.072	0.135	0.048	-.273**	0.05	0.116	-0.158	-0.143	0.072	-0.008	0.082	0.061	-0.067	.234*	0.138	-0.035	.290**	-0.095	0.002	.294**	0.027	-0.069	-.261**	.287**	0.138	0.158	-0.019	0.072	-.280**	.189*	-.294**	0.035	0.177	-0.022	-.278**	-.275**	0.124	-.239**	-0.074	0.074	.545**	-0.135	-.221*	-0.074	0.164	0.138	-.189*
Oidiodendron	-0.033	-0.004	0.082	0.118	0.063	-.247**	0.025	0.113	-0.103	-0.109	0.039	-0.035	0.077	0.112	-0.037	.263**	0.028	-0.025	.308**	-0.097	0.162	.300**	0.067	-0.064	-.319**	.355**	0.145	0.162	0.03	0.131	-.188*	.267**	-.373**	0.04	0.099	0.1	-.355**	-.351**	.320**	-.261**	-0.114	0.026	.543**	-0.172	-.277**	-0.109	.212*	.222*	-.242**
* p＜0.05, ** p＜0.01
[truncated: 6 more columns]
